# Supplementary material for: Association Between Social Vulnerability Index and Cardiovascular Disease: A Behavioral Risk Factor Surveillance System Study
Source: PubMed Central journal article supplement — J Am Heart Assoc. 2022 Jul 29;11(15):e024414. doi: 10.1161/JAHA.121.024414 (PMC9375494; doi:10.1161/jaha.121.024414), 2022-07-29

## **SUPPLEMENTAL MATERIAL**

**Table S1. Odds ratios (95% confidence interval) comparing the association of tertiles of social vulnerability index and area deprivation index with chronic comorbidities.**

| <b>Odds Ratio (95% Confidence Interval)</b> |                  |                          |                  |
|---------------------------------------------|------------------|--------------------------|------------------|
| <b>SVI</b>                                  |                  | <b>ADI</b>               |                  |
| <b>Hypertension</b>                         | <b>Adjusted</b>  | <b>Hypertension</b>      | <b>Adjusted</b>  |
| SVI <0.33                                   | 1.00 (ref)       | ADI <0.40                | 1.00 (ref)       |
| SVI 0.33-0.53                               | 1.03 (1.01,1.06) | ADI 0.40-0.65            | 1.12 (1.09,1.16) |
| SVI ≥0.54                                   | 1.14 (1.11,1.17) | ADI ≥0.65                | 1.28 (1.25,1.32) |
| <b>Hyperlipidemia</b>                       |                  | <b>Hyperlipidemia</b>    |                  |
| SVI <0.33                                   | 1.00 (ref)       | ADI <0.40                | 1.00 (ref)       |
| SVI 0.33-0.53                               | 1.04 (1.01,1.06) | ADI 0.40-0.65            | 1.04 (1.01,1.07) |
| SVI ≥0.54                                   | 1.09 (1.06,1.12) | ADI ≥0.65                | 1.11 (1.08,1.14) |
| <b>Diabetes mellitus</b>                    |                  | <b>Diabetes mellitus</b> |                  |
| SVI <0.33                                   | 1.00 (ref)       | ADI <0.40                | 1.00 (ref)       |
| SVI 0.33-0.53                               | 1.06 (1.03,1.08) | ADI 0.40-0.65            | 1.09 (1.05,1.12) |
| SVI ≥0.54                                   | 1.12 (1.09,1.15) | ADI ≥0.65                | 1.20 (1.17,1.23) |
| <b>Current Smoker</b>                       |                  | <b>Current Smoker</b>    |                  |
| SVI <0.33                                   | 1.00 (ref)       | ADI <0.40                | 1.00 (ref)       |
| SVI 0.33-0.53                               | 1.11 (1.09,1.14) | ADI 0.40-0.65            | 1.18 (1.15,1.21) |
| SVI ≥0.54                                   | 1.05 (1.03,1.07) | ADI ≥0.65                | 1.34 (1.31,1.38) |

|                                |                   |                                |                   |
|--------------------------------|-------------------|--------------------------------|-------------------|
| <b>Current E-cigarette use</b> |                   | <b>Current E-cigarette use</b> |                   |
| SVI <0.33                      | 1.00 (ref)        | ADI <0.40                      | 1.00 (ref)        |
| SVI 0.33-0.53                  | 1.15 (1.09- 1.21) | ADI 0.40-0.65                  | 1.19 (1.12- 1.26) |
| SVI ≥0.54                      | 1.22 (1.16- 1.29) | ADI ≥0.65                      | 1.16 (1.10- 1.22) |
| <b>Current Marijuana use</b>   |                   | <b>Current Marijuana use</b>   |                   |
| SVI <0.33                      | 1.00 (ref)        | ADI <0.40                      | 1.00 (ref)        |
| SVI 0.33-0.53                  | 1.17 (1.09- 1.25) | ADI 0.40-0.65                  | 0.53 (0.50- 0.57) |
| SVI ≥0.54                      | 1.57 (1.49- 1.67) | ADI ≥0.65                      | 0.40 (0.37- 0.43) |
| <b>CKD</b>                     |                   | <b>CKD</b>                     |                   |
| SVI <0.33                      | 1.00 (ref)        | ADI <0.40                      | 1.00 (ref)        |
| SVI 0.33-0.53                  | 1.05 (1.01,1.10)  | ADI 0.40-0.65                  | 1.04 (0.99,1.10)  |
| SVI ≥0.54                      | 1.17 (1.12,1.23)  | ADI ≥0.65                      | 1.06 (1.01,1.11)  |
| <b>ASCVD</b>                   |                   | <b>ASCVD</b>                   |                   |
| SVI <0.33                      | 1.00 (ref)        | ADI <0.40                      | 1.00 (ref)        |
| SVI 0.33-0.53                  | 1.09 (1.06,1.12)  | ADI 0.40-0.65                  | 1.13 (1.10,1.18)  |
| SVI ≥0.54                      | 1.15 (1.12,1.19)  | ADI ≥0.65                      | 1.27 (1.24,1.31)  |

Model is adjusted for age, sex, race, employment, income, association with federal poverty line, and health plan coverage. Key: SVI: social vulnerability index; ASCVD: atherosclerotic cardiovascular disease; CKD: chronic kidney disease.

**Figure S1. Overall state level variation in tertiles of social vulnerability index.**

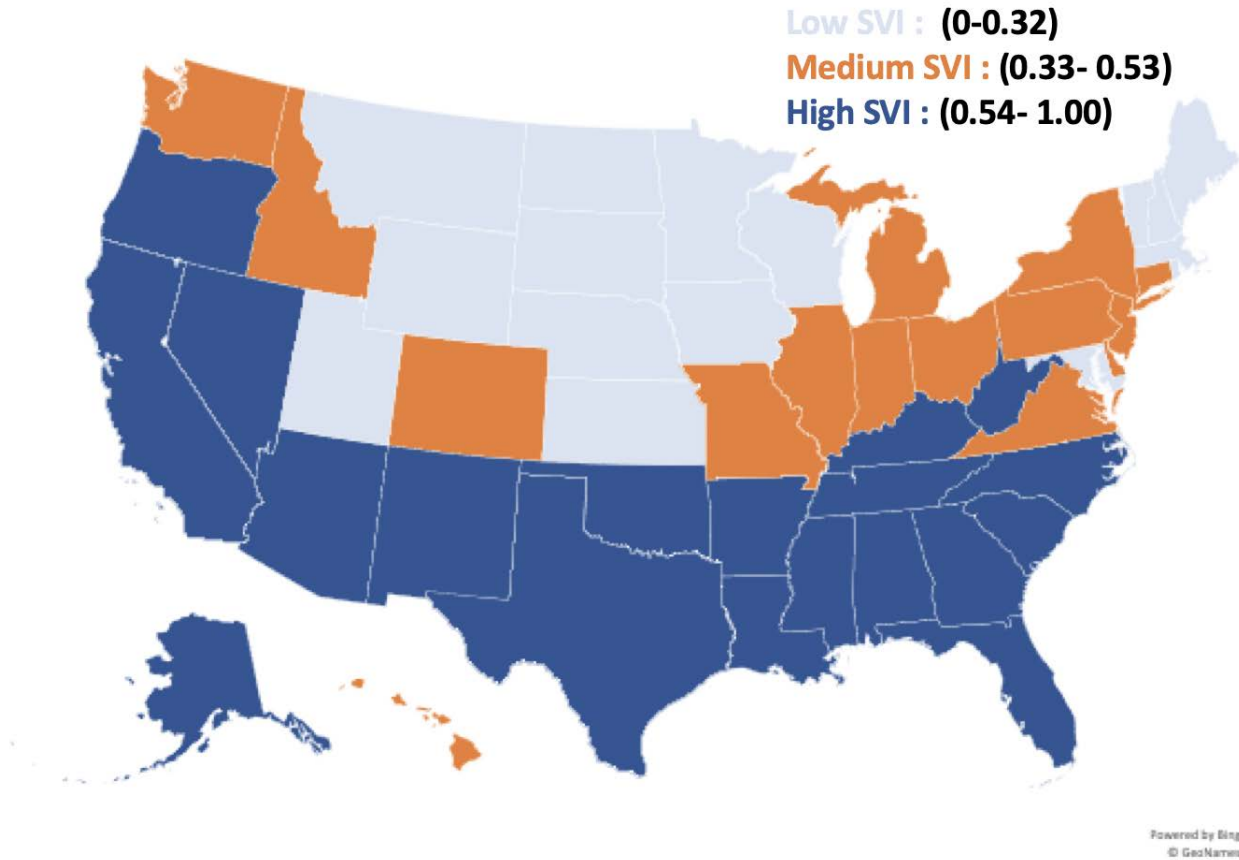

Supplement: JAH3-11-e024414-s001.pdf [file JAH3-11-e024414-s001.pdf]
